# Supplementary material for: Use of continuous ketamine infusion as an adjunctive agent in neonates and infants with refractory and super refractory status epilepticus
Source: Research Square preprint supplement (doi:10.21203/rs.3.rs-493872/v1), 2021-05-14
Supplement: Supplementary file 2 [file 6abee92c8339734cbefa4b49.docx]

**TABLE: Demographics of patients receiving continuous ketamine infusion for RSE**

| Patient | Age | Underlying Etiology | Anti-Seizure Medications Prior to Ketamine | Concomitant Anti-Seizure Medications with Ketamine | Outcome |
| --- | --- | --- | --- | --- | --- |
| 1 | 29 days  (Corrected to 40 weeks) | Abusive head trauma | - Lorazepam - Phenobarbital - Fosphenytoin - Midazolam - Levetiracetam - Pentobarbital - Lacosamide - Topiramate | - Levetiracetam - Lacosamide - Phenobarbital - Fosphenytoin - Topiramate | Successful discontinuation of vasopressors, resolution of seizures on EEG, and subsequent tapering of maintenance anti-seizure medications prior to discharge |
| 2a | 52 days  (Corrected to 40 weeks) | Ischemic stroke secondary to vein of Galen malformation | - Lorazepam - Phenobarbital - Fosphenytoin - Levetiracetam - Midazolam | - Fosphenytoin - Midazolam - Levetiracetam | Resolution of seizures and continuation of maintenance therapy with levetiracetam and topiramate |
| 2b | 79 days | Ischemic stroke secondary to vein of Galen malformation | - Midazolam - Fosphenytoin - Topiramate - Levetiracetam - Phenobarbital | - Midazolam - Phenobarbital - Fosphenytoin - Lacosamide - Clobazam - Topiramate | Resolution of seizures and modification of maintenance therapy to phenobarbital, topiramate, and clobazam |
| 3 | 60 days | Neurologic injury secondary to cardiac arrest | - Lorazepam - Levetiracetam - Fosphenytoin - Phenobarbital - Midazolam - Pentobarbital | - Levetiracetam - Fosphenytoin | Withdrawal of life sustaining therapy and death |

2a = first admission; 2b = second admission
